# Supplementary material for: Isoliquiritigenin Induces Mitochondrial Dysfunction and Apoptosis by Inhibiting mitoNEET in a Reactive Oxygen Species-Dependent Manner in A375 Human Melanoma Cells
Source: Hindawi journal article supplement (doi:10.1155/2019/9817576), 2019-01-21
Supplement: f1 [file 9817576.f1.pdf]

## Supplemental data

**Figure S1. pLVX-CMV-MCS-T2A-Zsgreen vector map.**

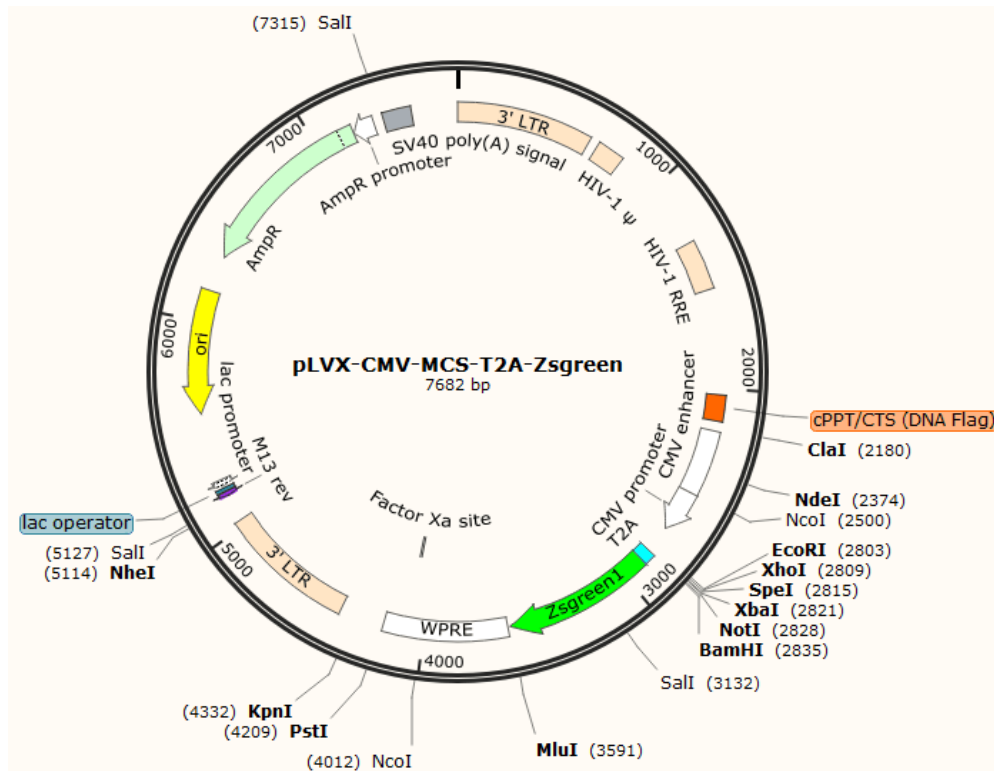

**Figure S2. mitoNEET overexpression vector sequencing and matching result.**

```

CCGATGGGGGGGCATATAGCAGAGCTCGTTTACTGACCGTCAGATCGCCTGGAGACGCCATCCACGCTG
TTTTGACCTCCATAGAAGACACCGACTTTACTAGAGGATCTATTTCCGGTGAATTCGCCACCATGAGTCTC
TGACTTCCAGTTCCAGCGTACGAGTTGAATGGATCGCAGCAGTTACCATTGCTGCTGGGACAGCTGCAA
TTGGTTATCTAGCTTACAAAAAGATTTTATGTTAAAGATCATCGAAATAAAGCTATGATAAACCTTCACA
TCCAGAAAGACAACCCCAAGATAGTACATGCTTTTGCATGGAGGATTTGGGAGATAAAGCTGTGTACT
GCCGTTGTTGGAGGTCCAAAAAGTTCCATTCTGTGATGGGGCTCACACAAAACATAACGAAGAGACTG
GAGACAATGTGGGCCCTCTGATCATCAAGAAAAAAGAACTGACTACAAGGATGACGATGACAAGGATT
ACAAAGACGACGATGATAAGGACTATAAGGATGATGACGACAAAAGGATCCGAGGGCAGAGGAAGTCTTC
TAACATGCGGTGACGTGGAGGAGAATCCCGGCCCTATGGCCAGTCCAAGCACGGCCTGACCAAGGAGA
TGACCATGAAGTACCGCATGGAGGGCTGCGTGGACGGCCACAAGTTTCGTGATCACCGGCGAGGGCATCG
GCTACCCCTTCAAGGGCAAGCAGGCCATCAACCTGTGCGTGGTGGAGGGCGGCCCTTGCCCTTCGCCG
AGGACATCTTGTCCGCCCTTCATGTACGGCAACCGGTGTTACCGAGTACCCCAAGGACATCGTCG
ACTACTTCAAGAACTCTTGCCCCGCCGGCTACACCTGGGACCGCTCCTTCTGTTTCGAGGACGGCGCCG
TGTGCATCTGCAACGCCGACATCA
    
```

mitoNEET overexpression vector sequencing result. (objective sequence highlighted in yellow and 3\* flag sequence highlighted in purple).

```

CISD1+3flag? -----
W24023_W1849 1 ccgatggggggccatatagcagagctcgttttagtgaccgtcagatcgctggagacgccatcccacgtgt

CISD1+3flag? 1 -----atgagctctg
W24023_W1849 71 ttgacctccatagaagacaccgactttactagaggatctatttccgggtaattcgccaccatgagctctg

CISD1+3flag? 10 acttccagttccagcgtacgagttgaatggatcgcagcagttaccattgctgctgggacagctgcaattg
W24023_W1849 141 acttccagttccagcgtacgagttgaatggatcgcagcagttaccattgctgctgggacagctgcaattg

CISD1+3flag? 80 gtatctagcttacaaaagattttatgttaagatcatcgaaataaagctatgataaaccttcacatcca
W24023_W1849 211 gtatctagcttacaaaagattttatgttaagatcatcgaaataaagctatgataaaccttcacatcca

CISD1+3flag? 150 gaaagacaaccccccaagatagtagcttttgacatggaggatttgggagataaaagctgtgtactgccgt
W24023_W1849 281 gaaagacaaccccccaagatagtagcttttgacatggaggatttgggagataaaagctgtgtactgccgt

CISD1+3flag? 220 tgttgagggtccaaaaagtcccatctctgtgatggggctcacacaaaacataaacgaagagactggagaca
W24023_W1849 351 tgttgagggtccaaaaagtcccatctctgtgatggggctcacacaaaacataaacgaagagactggagaca

CISD1+3flag? 290 atgtgggccctctgatcatcaagaaaaaagaactgactacaaggatgacgatgacaaggattacaaaga
W24023_W1849 421 atgtgggccctctgatcatcaagaaaaaagaactgactacaaggatgacgatgacaaggattacaaaga

CISD1+3flag? 360 cgacgatgataaggactataaggatgatgacgacaaa-----
W24023_W1849 491 cgacgatgataaggactataaggatgatgacgacaaaaggatccgagggcagaggaagtcttctaacatgc

CISD1+3flag? -----
W24023_W1849 561 ggtgacgtggaggagaatcccggccctatggcccagtccaagcacggcctgaccaaggagatgaccatga

CISD1+3flag? -----
W24023_W1849 631 agtaccgcatggagggtgcgtggacggccacaagttcgtgatcaccggcgagggcatcggtaccctt

```

mitoNEET overexpression vector matching result. (green region showed objective sequence of mitoNEET overexpression vector matched mitoNEET fragment).

**Table S1. Primers designed for mitoNEET and 3\*flag.**

|                        |                                                |
|------------------------|------------------------------------------------|
| h-CISD1-Eco/Bam-F      | ggatctatttccgggtaattc gcacc ATGAGTCTGACTTCCAGT |
| h-CISD1-r              | TCGTCATCCTTG TAGTCAGTTTCTTTTTTCTTGATGAT        |
| 3flag ( FNDC5 ) -f     | GACTACAAGGATGACGATGA                           |
| 3flag(FNDC5)-Eco/Bam-R | acttctctgccctcgatcc TTTGTCGTCATCATCCT          |
